# Supplementary material for: Spatially resolved analysis of TGF/BMP signalling in pancreatic ductal adenocarcinoma by digital pathology identifies patient subgroups with adverse outcome
Source: Research Square preprint supplement (doi:10.21203/rs.3.rs-6506146/v1), 2025-06-29

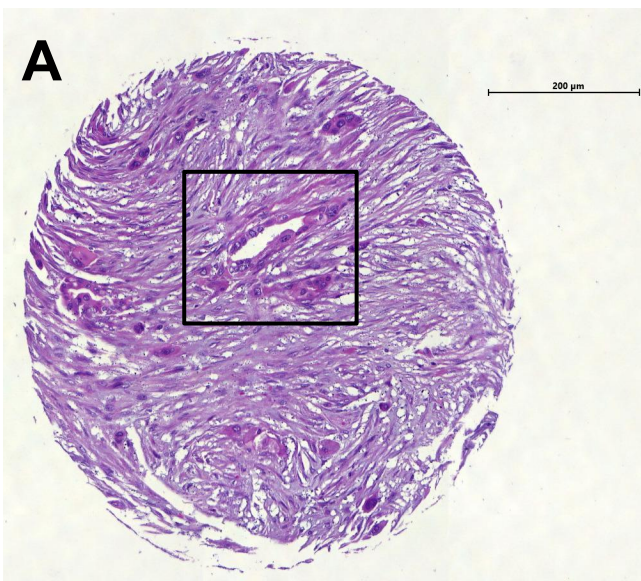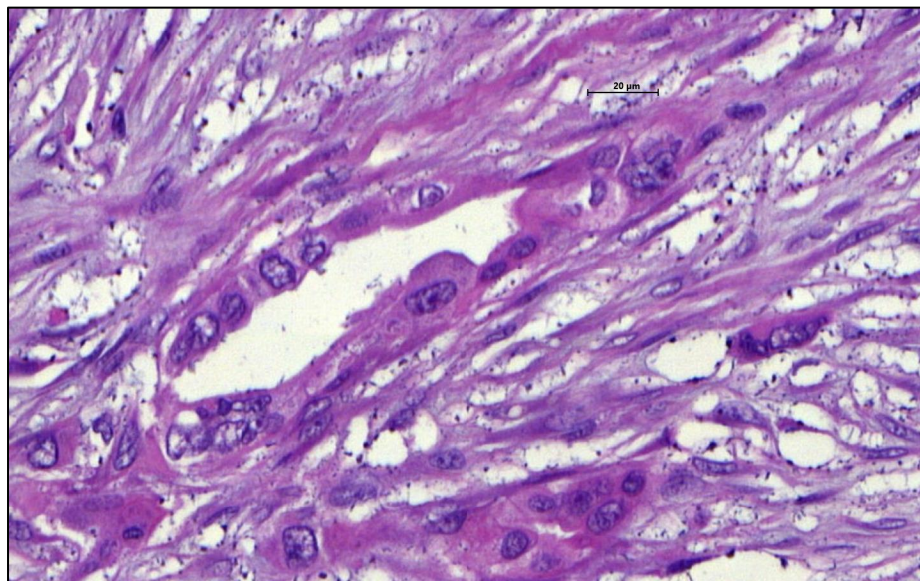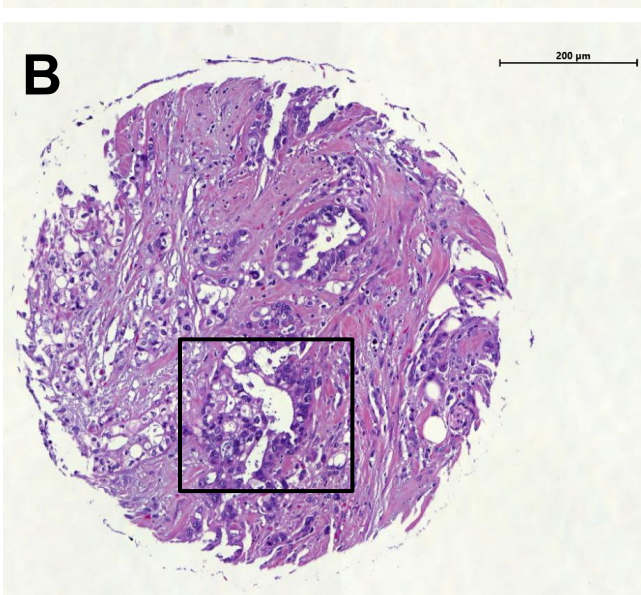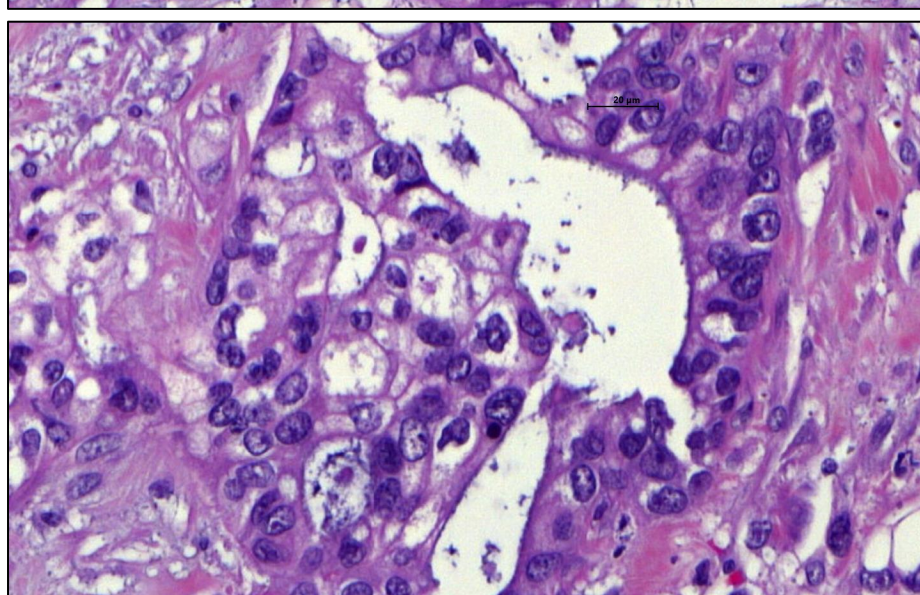

Supplement: Supplementary file [file ac1abc688012d68bb3fa73a4.pdf]
